# Supplementary material for: GMMA Is a Versatile Platform to Design Effective Multivalent Combination Vaccines
Source: MDPI journal article supplement (doi:10.3390/vaccines8030540), 2020-09-17
Supplement: s1 [file s1]

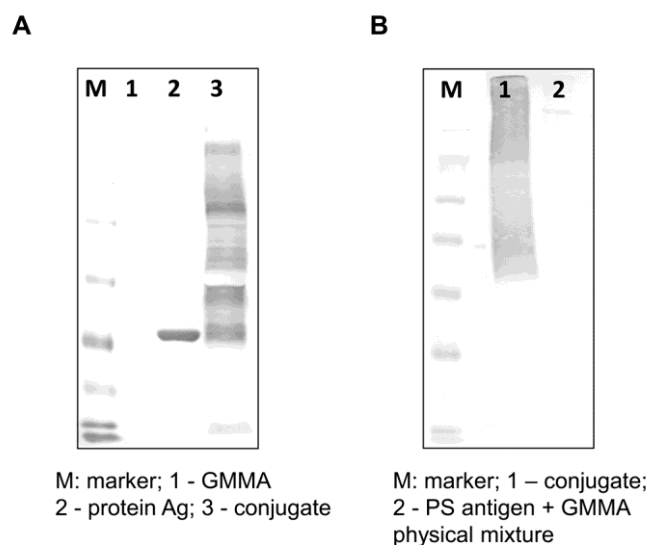

**Figure S1.** GMMA conjugates formation is verified by SDS PAGE/western blot analysis. Two examples are provided for conjugation of a protein antigen (**A**) and a polysaccharide antigen (**B**).

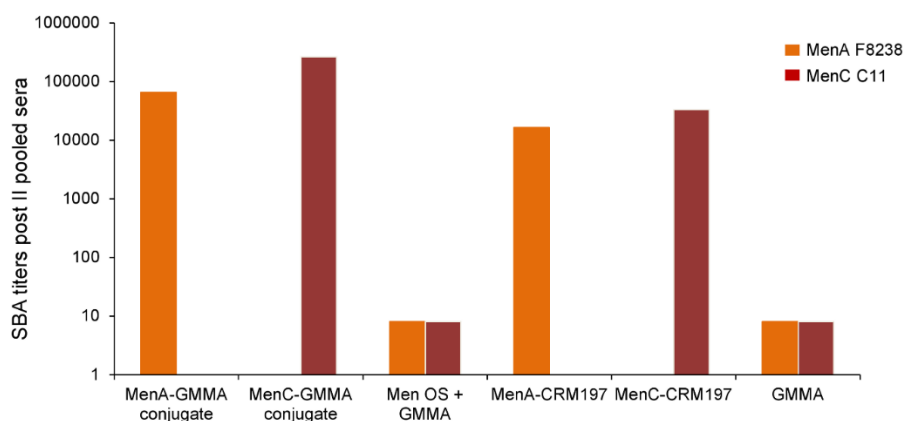

**Figure S2.** MenA and MenC oligosaccharides were conjugated to *S. Typhimurium* GMMA and compared in mice to corresponding MenA- or MenC-CRM197 conjugates, GMMA alone or physically mixed to Men oligosaccharides. Eight CD1 mice per group were i.m. immunized at days 0 and 28, with 1  $\mu$ g Men oligosaccharide per dose, in the presence of Alhydrogel. SBA titers of pooled sera collected 2 weeks after second injection against MenA and MenC strains are reported.

**Table S1.** Conjugation conditions used and main characteristics of the GMMA conjugates tested in this study.

| Conjugate                                | Chemistry                                     | Targeting on GMMA     | Conjugation Conditions                                                                                                                            | Antigen/GMMA w/w Ratio in Purified Conjugate | Number Saccharide Chains/GMMA Particle |
|------------------------------------------|-----------------------------------------------|-----------------------|---------------------------------------------------------------------------------------------------------------------------------------------------|----------------------------------------------|----------------------------------------|
| STm GMMA-CSP                             | SH-maleimido                                  | Proteins              | GMMA/protein w/w ratio of 1:1; [GMMA] 96.7 ug/mL, pH 6, 4h, RT                                                                                    | 0.33                                         | na                                     |
| STm GMMA-Pfs25                           | SH-maleimido                                  | Proteins              | GMMA/protein w/w ratio of 1:1; [GMMA] 285 g/mL, pH 5, 4h, RT                                                                                      | 0.17                                         | na                                     |
| STm GMMA-fHbp                            | SH-maleimido                                  | Proteins              | GMMA/protein w/w ratio of 2:1; [GMMA] 4 mg/mL, pH 6, 5h, RT                                                                                       | 0.3                                          | na                                     |
| <i>S. sonnei</i> GMMA-SsIE               | Reductive amination                           | LPS                   | GMMA/protein w/w ratio of 1:1; [GMMA] 1.23 mg/mL, pH 6.5, ON, RT                                                                                  | 0.35                                         | na                                     |
| <i>S. sonnei</i> GMMA-FdeC               | BS3                                           | Proteins              | GMMA/protein w/w ratio of 1:1; [GMMA] 5.75 mg/mL, pH 7.4, ON, RT                                                                                  | 0.12                                         | na                                     |
| Bivalent <i>S. sonnei</i> GMMA-SsIE-FdeC | BS3 for FdEc and reductive amination for SsIE | Both proteins and LPS | BS3: GMMA/protein w/w ratio of 1:1; [GMMA] 6.45 mg/mL, pH 7.4, ON, RT<br>Red am: GMMA/protein w/w ratio of 1:1; [GMMA] 1.18 mg/mL, pH 6.5, ON, RT | 0.08 FdeC, 0.39 SsIE                         | na                                     |
| MenA-(MenB)GMMA                          | SIDEA                                         | Proteins              | GMMA/OS w/w ratio of 1:10; [GMMA] 10 mg/mL, pH 7.2, ON, RT                                                                                        | 0.054                                        | 2490                                   |
| MenC-(MenB)GMMA                          | SIDEA                                         | Proteins              | GMMA/OS w/w ratio of 1:10; [GMMA] 10 mg/mL, pH 7.2, ON, RT                                                                                        | 0.10                                         | 4523                                   |
| Bivalent MenAC-(MenB)GMMA                | SIDEA                                         | Proteins              | GMMA/MenA OS/MenC OS w/w/w ratio of 1:10:10; [GMMA] 10 mg/mL, pH 7.2, ON, RT                                                                      | 0.103 (MenA)<br>0.12 (MenC)                  | 3847 (MenA),<br>5168 (MenC)            |

| Conjugate                | Chemistry | Targeting on GMMA | Conjugation Conditions                                                       | Antigen/GMMA w/w Ratio in Purified Conjugate | Number Saccharide Chains/GMMA Particle |
|--------------------------|-----------|-------------------|------------------------------------------------------------------------------|----------------------------------------------|----------------------------------------|
| MenA-(STm)GMMA           | SIDEA     | Proteins          | GMMA/OS w/w ratio of 1:10; [GMMA] 10 mg/mL, pH 7.2, ON, RT                   | 0.032                                        | 417                                    |
| MenC-(STm)GMMA           | SIDEA     | Proteins          | GMMA/OS w/w ratio of 1:10; [GMMA] 10 mg/mL, pH 7.2, ON, RT                   | 0.038                                        | 479                                    |
| Bivalent MenAC-(STm)GMMA | SIDEA     | Proteins          | GMMA/MenA OS/MenC OS w/w/w ratio of 1:10:10; [GMMA] 10 mg/mL, pH 7.2, ON, RT | 0.029 (MenA)<br>0.036 (MenC)                 | 378 (MenA),<br>454 (MenC)              |
| Hib-(MenB)GMMA           | SIDEA     | Proteins          | GMMA/OS w/w ratio of 1:3; [GMMA] 10.5 mg/mL, pH 7.2, ON, RT                  | 0.081                                        | 4230                                   |
